# Supplementary material for: Cryo-EM reveals conformational variability in the SARS-CoV-2 spike protein RBD induced by two broadly neutralizing monoclonal antibodies
Source: Royal Society of Chemistry journal article supplement (doi:10.1039/d5ra00373c), 2025-01-01
Supplement: d5ra00373c2.pdf [file d5ra00373c2.pdf]

### Supplemental Information

**Table S1:** Cryo-EM Data collection, image processing and refinement for S Protein: Fab4 complex

| Data Collection and Processing                      | State I        | State II       | State III      |
|-----------------------------------------------------|----------------|----------------|----------------|
| Magnification                                       | 54,000 kX      | 54,000 kX      | 54,000 kX      |
| Voltage                                             | 200 kV         | 200 kV         | 200 kV         |
| Electron exposure (e <sup>-</sup> /Å <sup>2</sup> ) | 50             | 50             | 50             |
| Defocus range (μm)                                  | -1.25 to -2.75 | -1.25 to -2.75 | -1.25 to -2.75 |
| Pixel size (Å)                                      | 0.92           | 0.92           | 0.92           |
| Symmetry Imposed                                    | C1             | C1             | C1             |
| Number of Movies                                    | 3789           |                |                |
| Number of Particles                                 | 1,63,492       | 93,959         | 49,160         |
| Map Resolution (Å)                                  | 4.54           | 5.152          | 4.9            |
| FSC threshold                                       | 0.143          | 0.143          | 0.143          |
| Map Resolution Range                                | 3.3-6.1        | 3.3-6.1        | 3.3-6.1        |
| Map Sharpening B Factor (Å <sup>2</sup> )           | -273           |                |                |
| RBD Conformation                                    | 2-RBD Up       | 3-RBD Up       | 3-RBD Up       |

**Table S2:** Cryo-EM Data collection, image processing and refinement for S Protein: Fab26 Complex

| Data Collection and Processing                      | Single Fab Masked | State I        | State II       |
|-----------------------------------------------------|-------------------|----------------|----------------|
| Magnification                                       | 54,000 kX         | 54,000 kX      | 54,000 kX      |
| Voltage                                             | 200 kV            | 200 kV         | 200 kV         |
| Electron exposure (e <sup>-</sup> /Å <sup>2</sup> ) | 45                | 45             | 45             |
| Defocus range (μm)                                  | -1.25 to -2.75    | -1.25 to -2.75 | -1.25 to -2.75 |
| Pixel size (Å)                                      | 0.92              | 0.92           | 0.92           |
| Symmetry Imposed                                    | C1                | C1             | C1             |
| Number of Movies                                    | 2102              |                |                |
| Number of Particles                                 | 1,09,596          | 26,719         | 48,584         |
| Map Resolution (Å)                                  | 4.4               | 7.3            | 4.8            |
| FSC threshold                                       | 0.143             | 0.143          | 0.143          |

|                                           |          |          |          |
|-------------------------------------------|----------|----------|----------|
| Map Resolution Range                      | 3.3-6.1  | 3.3-6.1  | 3.3-6.1  |
| Map Sharpening B Factor (Å <sup>2</sup> ) | -249     |          |          |
| RBD Conformation                          | 2-RBD Up | 2-RBD Up | 3-RBD Up |

**Table S3:** MolProbity Score for S Protein: Fab4 Complex

|                      |                   |                 |                  |
|----------------------|-------------------|-----------------|------------------|
|                      | SARS-CoV-2 + Fab4 |                 |                  |
| <b>Validation</b>    | <b>State I</b>    | <b>State II</b> | <b>State III</b> |
| MolProbity Score     | 1.88              | 2.28            | 2.32             |
| Clash Score          | 7.36              | 18.31           | 18.64            |
| Rotamer Outliers (%) | 0.20              | 0.26            | 0.18             |
| Ramachandran Plot    |                   |                 |                  |
| Outlier (%)          | 0.11              | 0.16            | 0.18             |
| Allowed (%)          | 7.66              | 8.73            | 9.78             |
| Favored (%)          | 92.23             | 91.11           | 90.04            |

**Table S4:** MolProbity Score for S Protein:Fab26 Complex

|                      |                          |                |                 |
|----------------------|--------------------------|----------------|-----------------|
|                      | SARS-CoV-2 + Fab26       |                |                 |
| <b>Validation</b>    | <b>Single Fab Masked</b> | <b>State I</b> | <b>State II</b> |
| MolProbity Score     | 1.99                     | 3.03           | 2.11            |
| Clash Score          | 8.77                     | 126.30         | 11.39           |
| Rotamer Outliers (%) | 0.40                     | 0.09           | 0.54            |
| Ramachandran Plot    |                          |                |                 |
| Outlier (%)          | 0.14                     | 0.10           | 0.07            |
| Allowed (%)          | 8.98                     | 7.30           | 9.43            |
| Favored (%)          | 90.88                    | 92.60          | 90.51           |

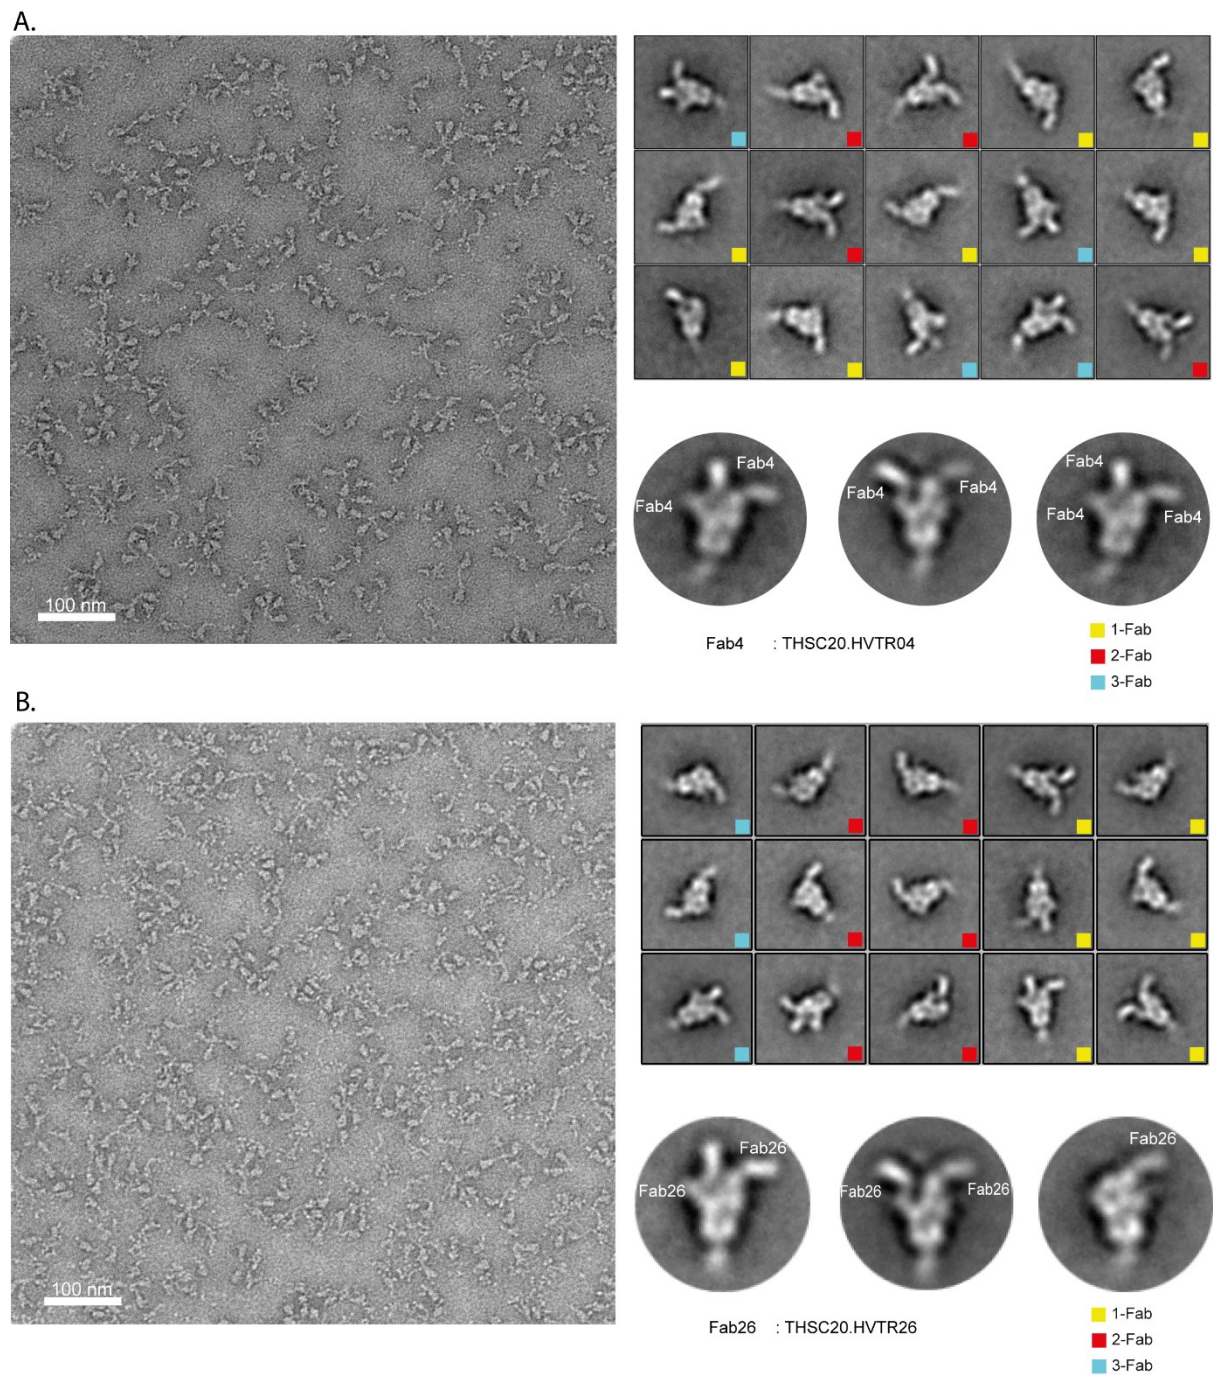

**Figure S1:** Negative staining micrograph and 2D class averages of S protein with A. Fab4 and B. Fab26 complexes

A.

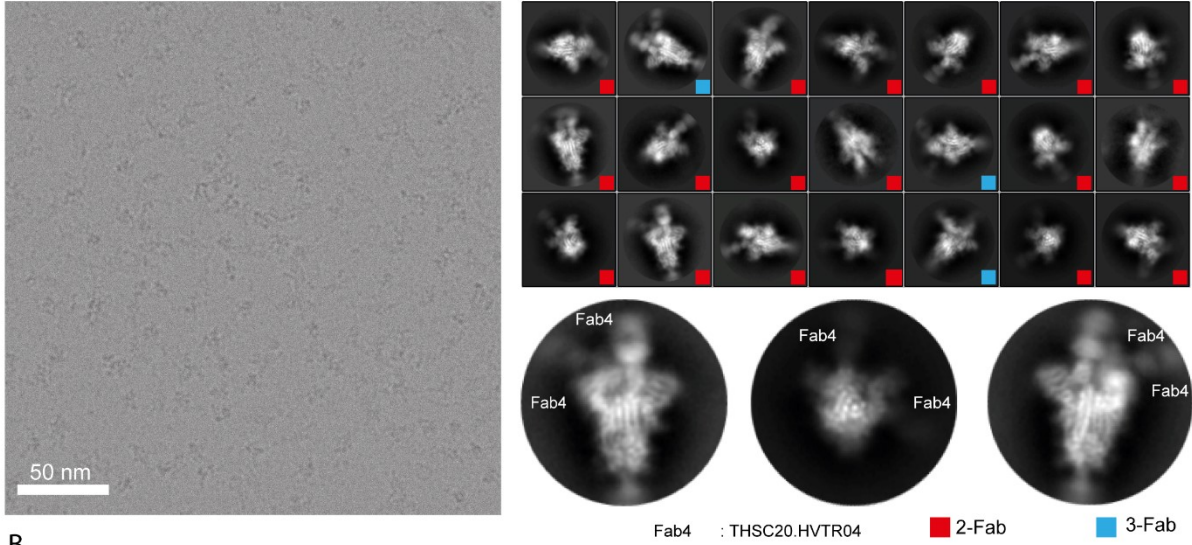

B.

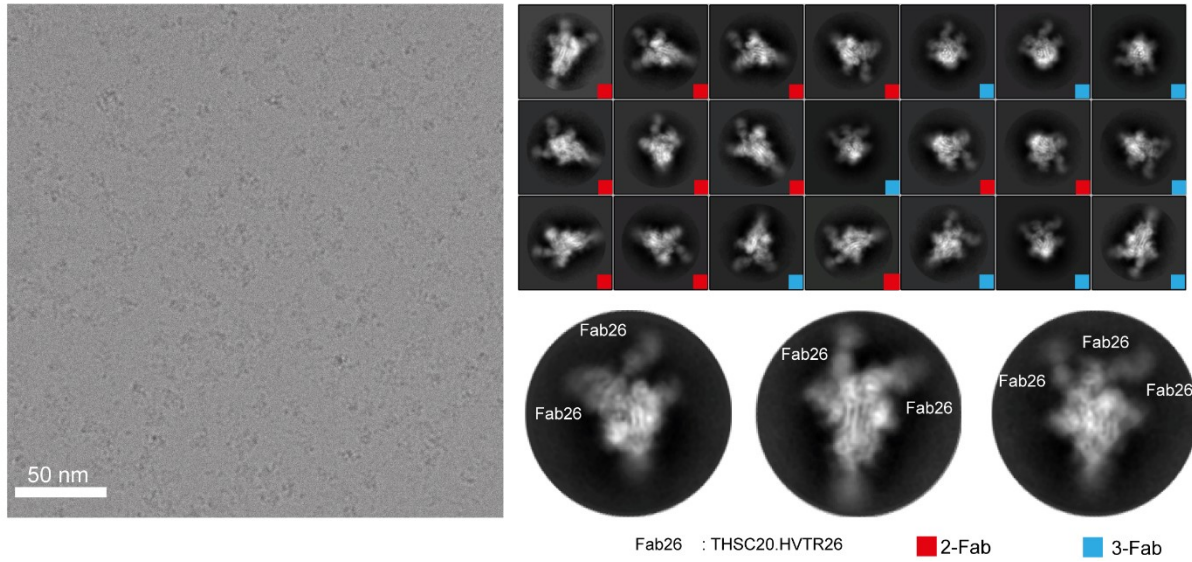

**Figure S2:** Cryo-electron microscopy micrograph and 2D class averages of S protein with A. Fab4 and B. Fab26 complexes

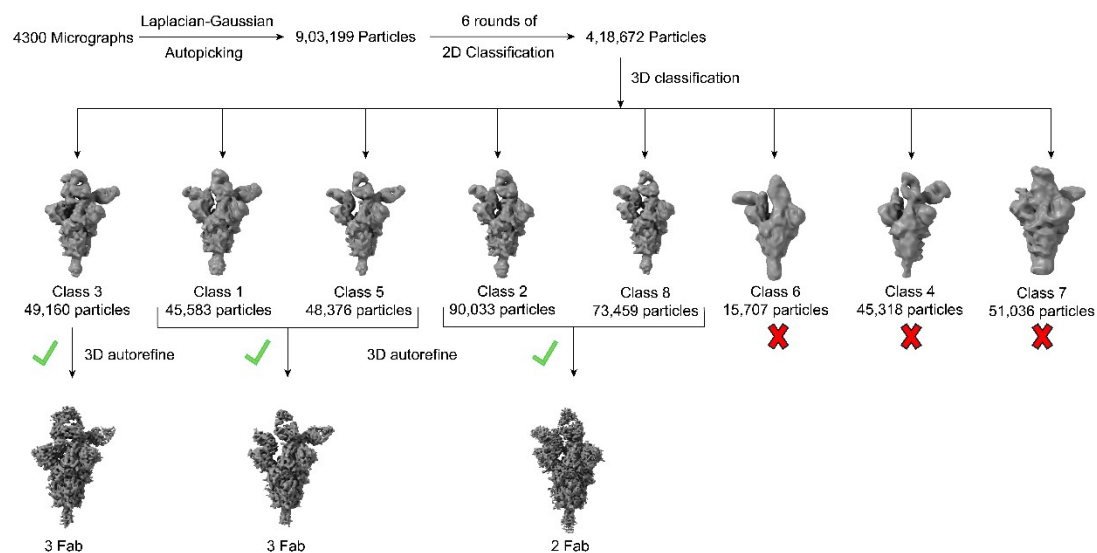

**Figure S3:** Workflow for the single-particle analysis (SPA) of cryo-EM for S protein: Fab4 complex: Pipeline illustrates the cryo-EM data processing, different conformations obtained and the refined structures. The green tick-marked classes were considered for refinements, whereas red cross classes were not further refined due to low-resolution.

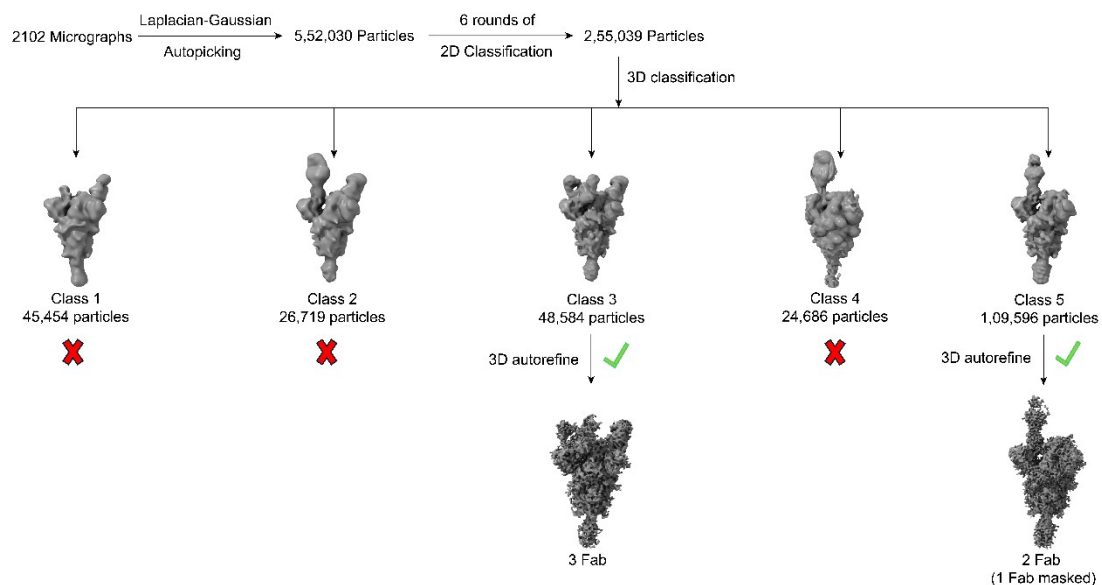

**Figure S4:** Workflow for the single-particle analysis (SPA) of cryo-EM for S protein: Fab26 complex: Pipeline illustrates the cryo-EM data processing, different conformations obtained and the refined structures. The green tick marked classes were considered for refinements, whereas red cross marked were not further refined due to low-resolution.



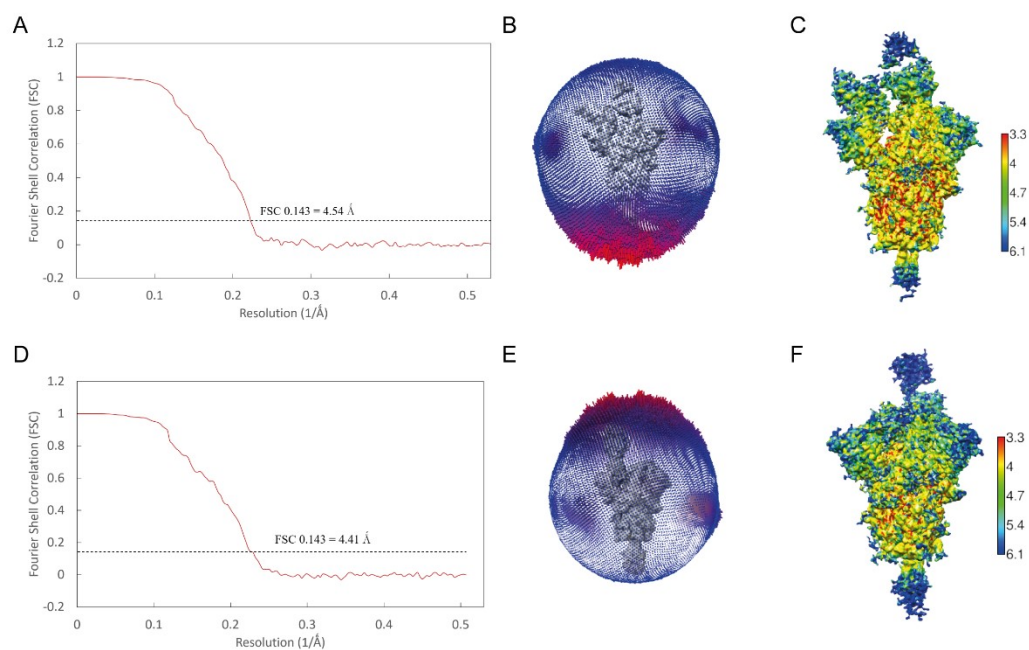

**Figure S5:** A, D) Gold standard Fourier shell correlation (FSC) curve calculated from the independent half maps results in 4.54 and 4.4 Å global resolution EM density map for the S protein complex with Fab4 and Fab26 respectively. B, E) Angular distribution plot for the final refined EM maps of S protein: Fab4/Fab26 complexes respectively without imposing symmetry (C1). C, F) Local resolution calculated for the high-resolution EM maps of Spike with Fab4 and Fab26 complexes respectively (C1 symmetry), coloured according to resolution calculated using ResMap.

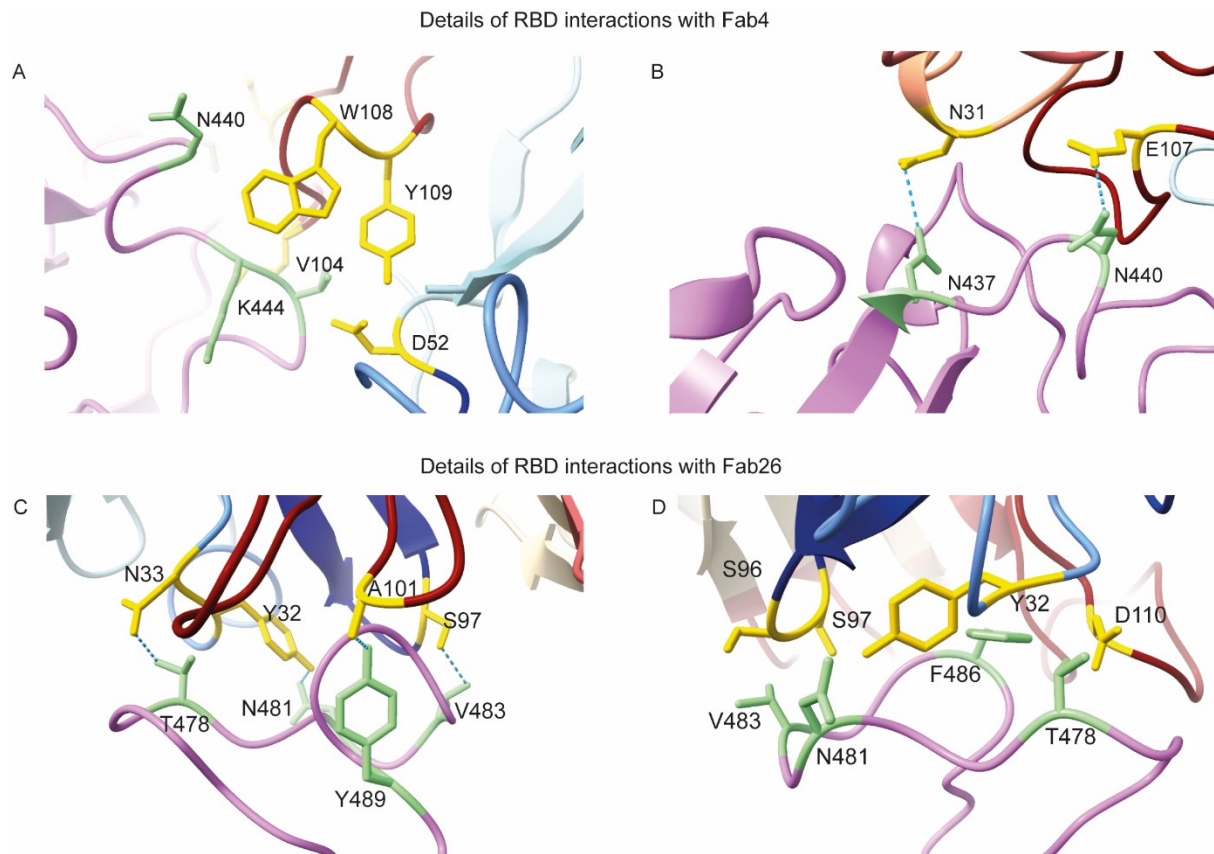

**Figure S6:** Interacting residues between Fabs and S trimer: **A.** Interaction by hydrogen bonding between Fab4 and RBD and the residues involved in the RBD region such as N437, and N440 are interacting with N31, and E107 respectively. **B.** Interacting partners of Fab4 and RBD involved in non-hydrogen bonding i.e Van-Der-Waals distance. **C.** For Fab26 complex, hydrogen bonding residues involved are T478, N481, Y489, and V483 which are interacting with N33, Y32, A101, and S97 respectively. Interacting residues of Fabs and RBD are colored in gold and pale green respectively. **D.** shows various interacting partners of Fab26 and RBD in the Van-Der-Waals distance.

A Interacting residues according to each protomer for all states (Fab4-S complex)

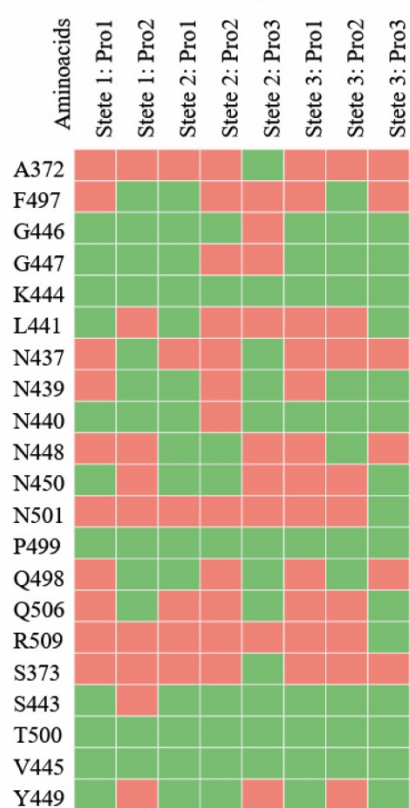

Red Absence of interaction  
Green Presence of interaction

B Interacting residues according to each protomer for all states (Fab26-S complex)

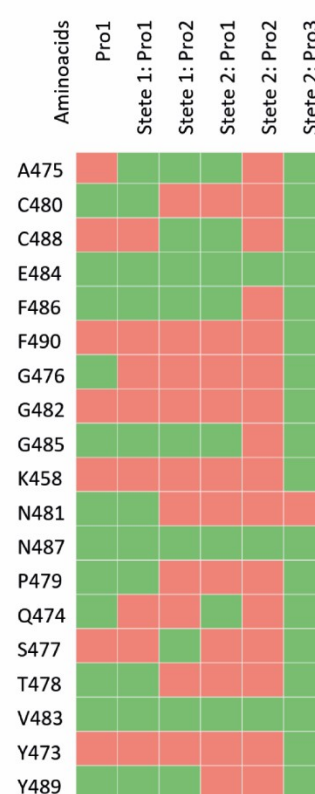

**Figure S7:** Heat map represents the interacting residues obtained from each protomer of various states captured for Fab4 and Fab26 complexes, **A**, **B** respectively.



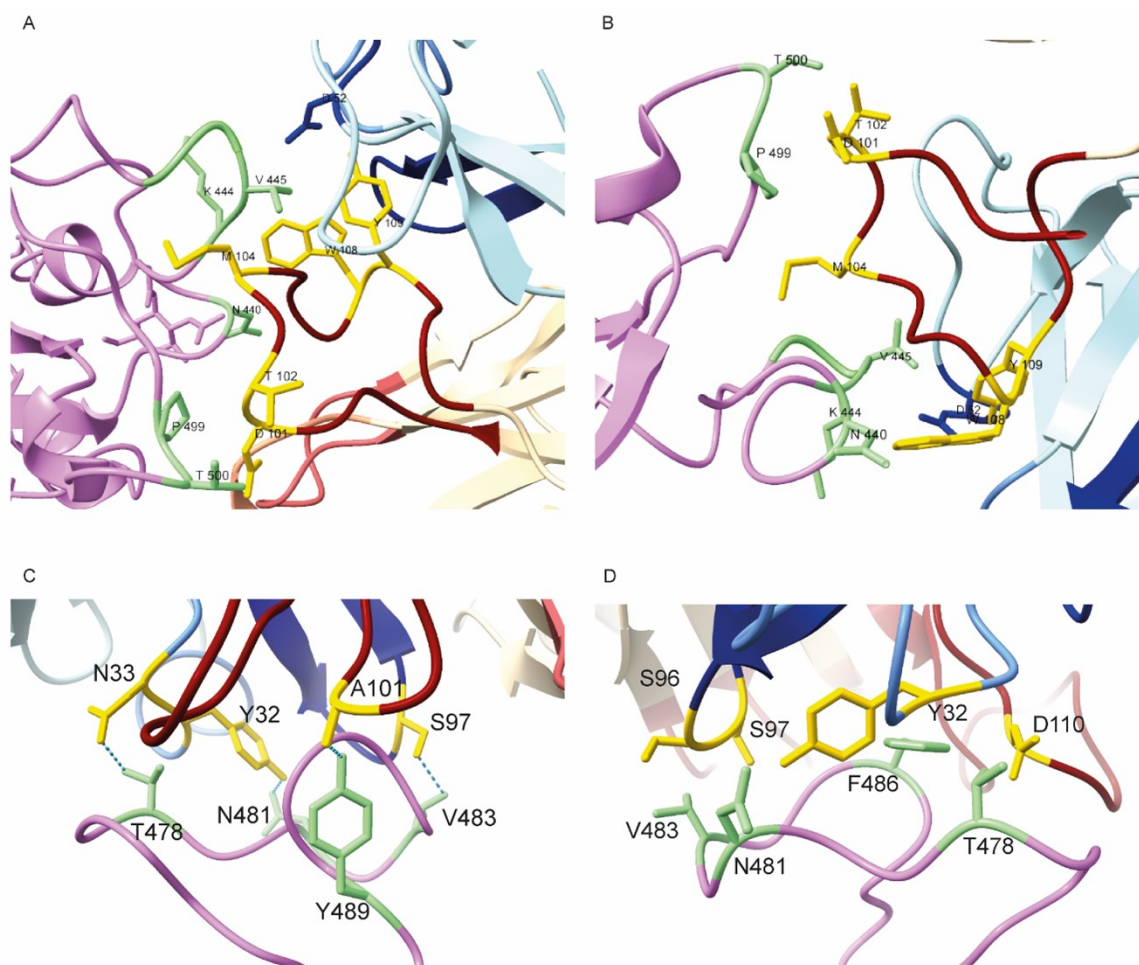

**Figure S8:** Potential key epitope residues interacting with Fab4 and 26 from the various states captured in cryo-EM analysis.

## Conformations captured in the complex of S protein with TAU-2212

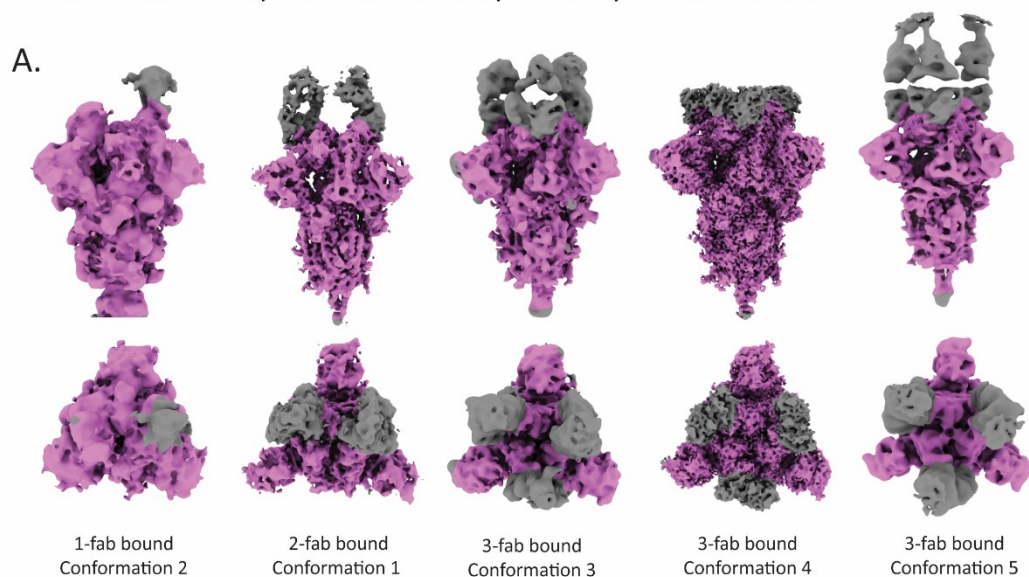

## Conformations captured in the complex of S protein with Fab4

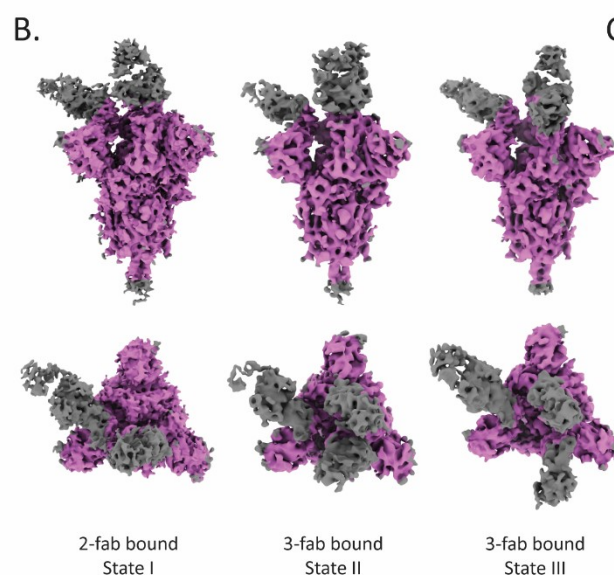

## Conformations captured in the complex of S protein with Fab26

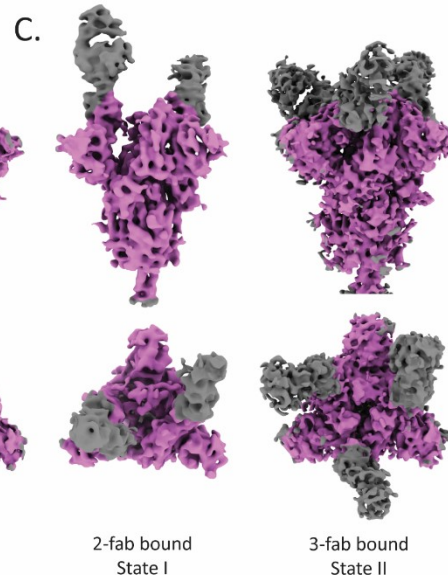

## D. Comparative analysis showing S protein RBD interacting residues

|     |            |                    |                                                        |                                                               |             |     |
|-----|------------|--------------------|--------------------------------------------------------|---------------------------------------------------------------|-------------|-----|
| 361 | CVADYSVLYN | <b>S</b> ASFSTFKCY | GVSPTKLNDL                                             | CFTNVYADSF                                                    | VIRGDEVQRQI | 410 |
| 411 | APGQTGKIAD | YNYKLPDDFT         | GCVIAWNSN                                              | <b>N</b> LDS <b>KVGG</b> NYN                                  | YLRLFRKSN   | 460 |
| 461 | LKPFERDIST | EIQAGS <b>T</b> PC | <b>N</b> G <b>V</b> E <b>G</b> F <b>N</b> C <b>Y</b> F | <b>P</b> L <b>Q</b> S <b>Y</b> G <b>F</b> Q <b>P</b> <b>T</b> |             | 500 |

**Figure S9:** Comparative analysis showing conformational flexibilities S protein with reported Fab (TAU-2212) (Li, Ruofan, et al., *Commun Biol*, 2022) and our antibodies (Fab4 and Fab26): **A.** Five different conformations observed in neutralization of TAU-2212. Conformations 2 and 1 show single-

and dual-fab bound forms respectively, while the others have three-fab bound. **B.** Three different conformations captured in complex with Fab4: state I have a dual-fab binder, and the rest are three-fab bound. **C.** Likewise, for the Fab26 complex, two states were seen showing dual and three-binders. S proteins are colored in purple, and the grey region of the map shows the Fab. Top and bottom views are shown. **D.** Sequence analysis of S protein RBD region (361-500) shows the interacting residues involved in Fab binding (Fab4, Fab26 and TAU-2212). Interacting residues of Fab4 and Fab26 are highlighted in green and cyan, respectively, while TAU-2212 are in bold italics.

Cryo-EM density maps of the Wuhan SARS-CoV-2 trimeric spike protein complexed with monoclonal antibodies (THSC20.HVTR04 & THSC20.HVTR26) are deposited in the Electron Microscopy Data Bank (EMDB) and the Protein Data Bank (PDB). The various conformational states captured for each antibody and its identifiers at EMDB and PDB are as follows:

|                                                       | EMDB accession code(s) | PDB ID(s) |
|-------------------------------------------------------|------------------------|-----------|
| Spike- THSC20.HVTR04(Fab4) complexes                  |                        |           |
| State - I: Spike 2-up RBD with THSC20.HVTR04 (Fab4)   | EMD-34546              | 8YBS      |
| State - II: Spike 3-up RBD with THSC20.HVTR04 (Fab4)  | EMD-34547              | NA        |
| State - III: Spike 3-up RBD with THSC20.HVTR04 (Fab4) | EMD-34548              | NA        |
| Spike- THSC20.HVTR26(Fab26) complexes                 |                        |           |
| State - I: Spike 2-up RBD with THSC20.HVTR26 (Fab26)  | EMD-34563              | 8YBY      |
| State - I: Spike 2-up RBD with THSC20.HVTR26 (Fab26)  | EMD-34602              | NA        |
| State - II: Spike 3-up RBD with THSC20.HVTR26 (Fab26) | EMD-34603              | 8YBZ      |
|                                                       |                        |           |
